# Supplementary material for: Integrated Metabolomic and Transcriptomic Analysis Reveals Differential Mechanism of Flavonoid Biosynthesis in Two Cultivars of Angelica sinensis
Source: MDPI journal article supplement (doi:10.3390/molecules27010306), 2022-01-04
Supplement: s1 [file s1]

# Supplemental Materials

# Integrated Metabolomic and Transcriptomic Analysis Reveals Differential Mechanism of Flavonoid Biosynthesis in Two Cultivars of *Angelica sinensis*

Tiantian Zhu <sup>1,2</sup>, Minghui Zhang <sup>1</sup>, Hongyan Su <sup>3</sup>, Meiling Li <sup>3</sup>, Yuanyuan Wang <sup>1,2</sup>, Ling Jin <sup>1,2,\*</sup> and Mengfei Li <sup>3,\*</sup>

- <sup>1</sup> College of Pharmacy, Gansu University of Chinese Medicine, Lanzhou 730101, China; ztt0935@gszy.edu.cn (T.Z.); [zmh0819@tom.com](mailto:zmh0819@tom.com) (M.Z.); [wyy19880821@126.com](mailto:wyy19880821@126.com) (Y.W.)  
<sup>2</sup> Northwest Collaborative Innovation Center for Traditional Chinese Medicine, Lanzhou 730000, China  
<sup>3</sup> State Key Laboratory of Aridland Crop Science, Gansu Agricultural University, Lanzhou 730070, China; Shy922322@163.com (H.S.); [mlli1996@163.com](mailto:mlli1996@163.com) (M.L.)  
\* Correspondence: [jinl@gszy.edu.cn](mailto:jinl@gszy.edu.cn) (L.J.); [lmf@gsau.edu.cn](mailto:lmf@gsau.edu.cn) (M.L.)

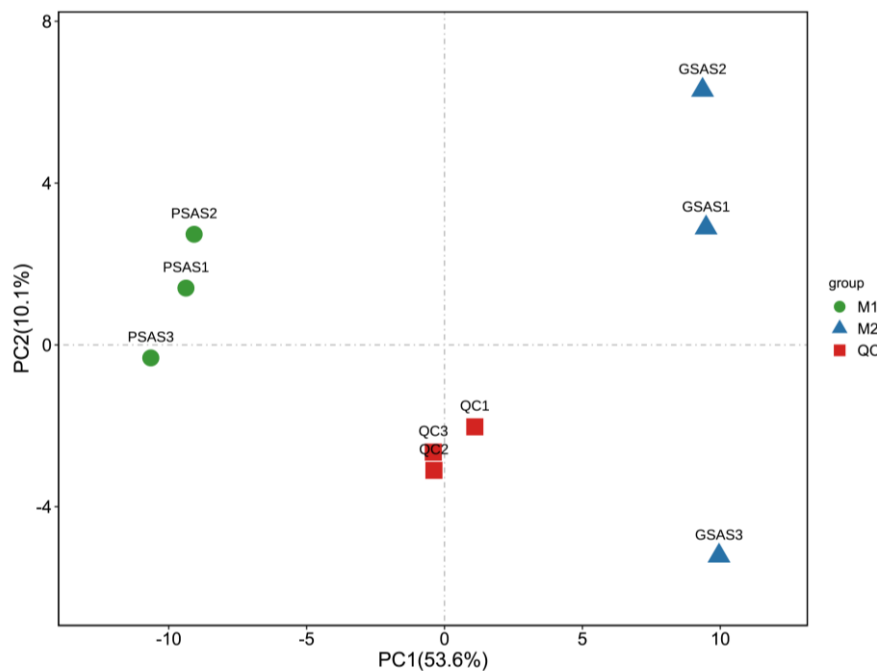

**Figure S1:** PCA of M1 (PSAS) and M2 (GSAS) as well as quality control (QC) samples.

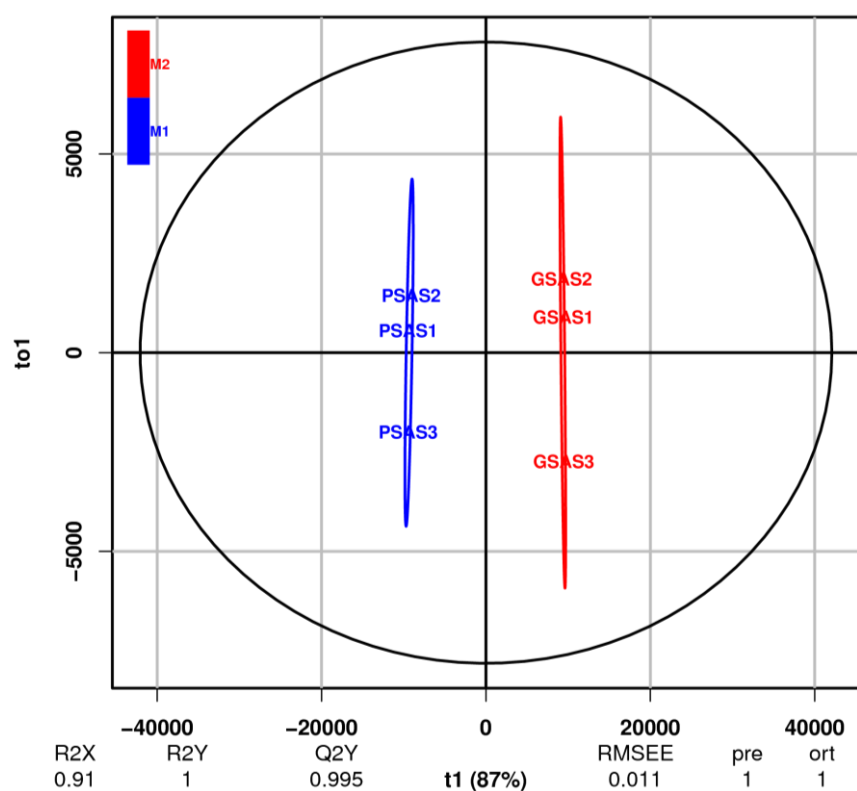

Figure S2: OPLS-DA of M1 and M2.

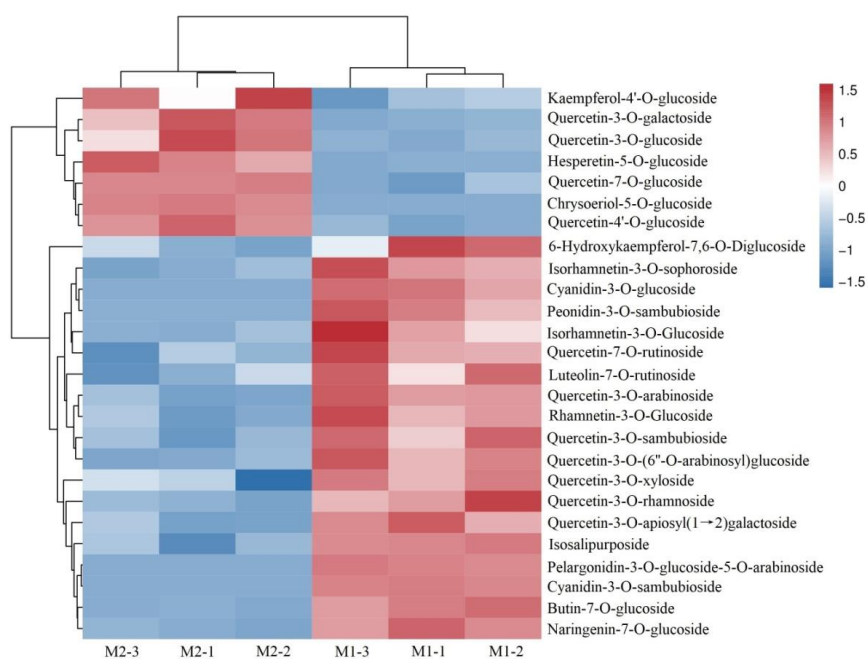

Figure S3: Cluster heat map of the 26 DAFs in M1 vs M2.

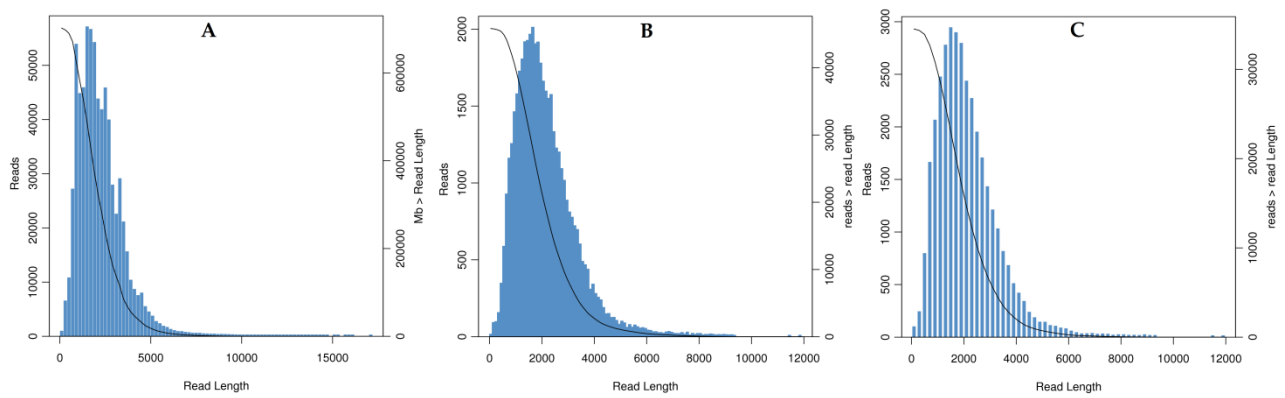

**Figure S4:** Length distribution of high-fidelity reads (A), high-quality isoforms (B) and full-length isoforms (C).

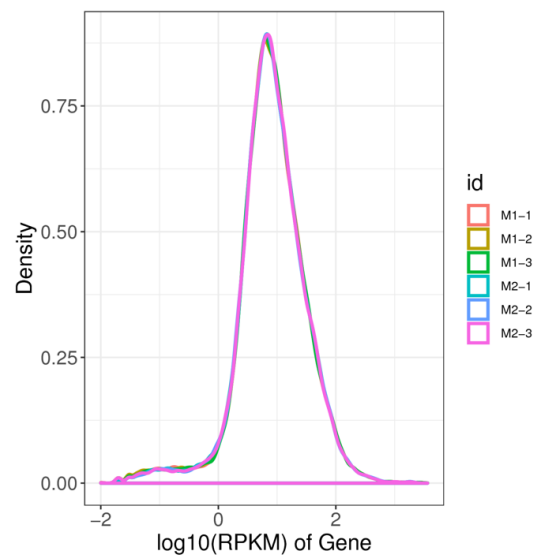

**Figure S5:** RPKM distribution of M1 and M2.

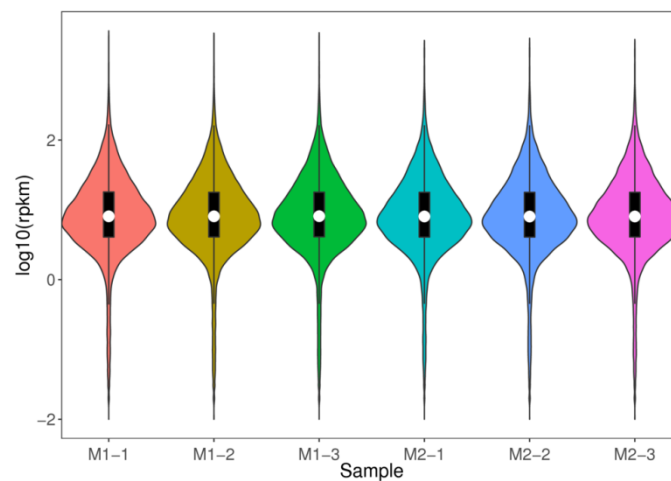

**Figure S6:** Violin plot of expression in M1 and M2.

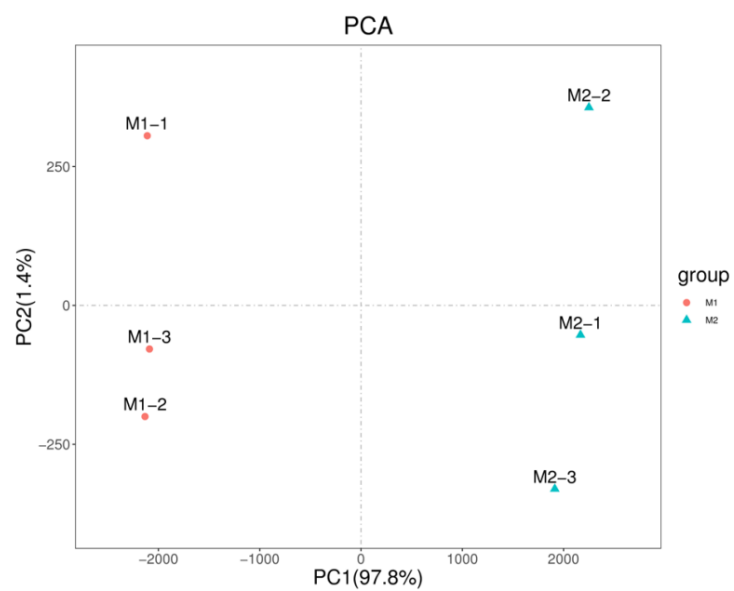

**Figure S7:** PCA analysis of M1 and M2.

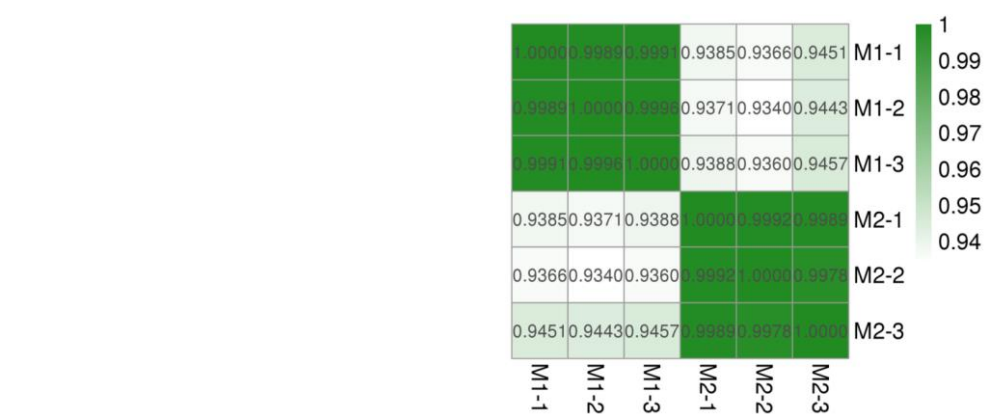

**Figure S8:** Pearson Heat-map correlation between M1 and M2.

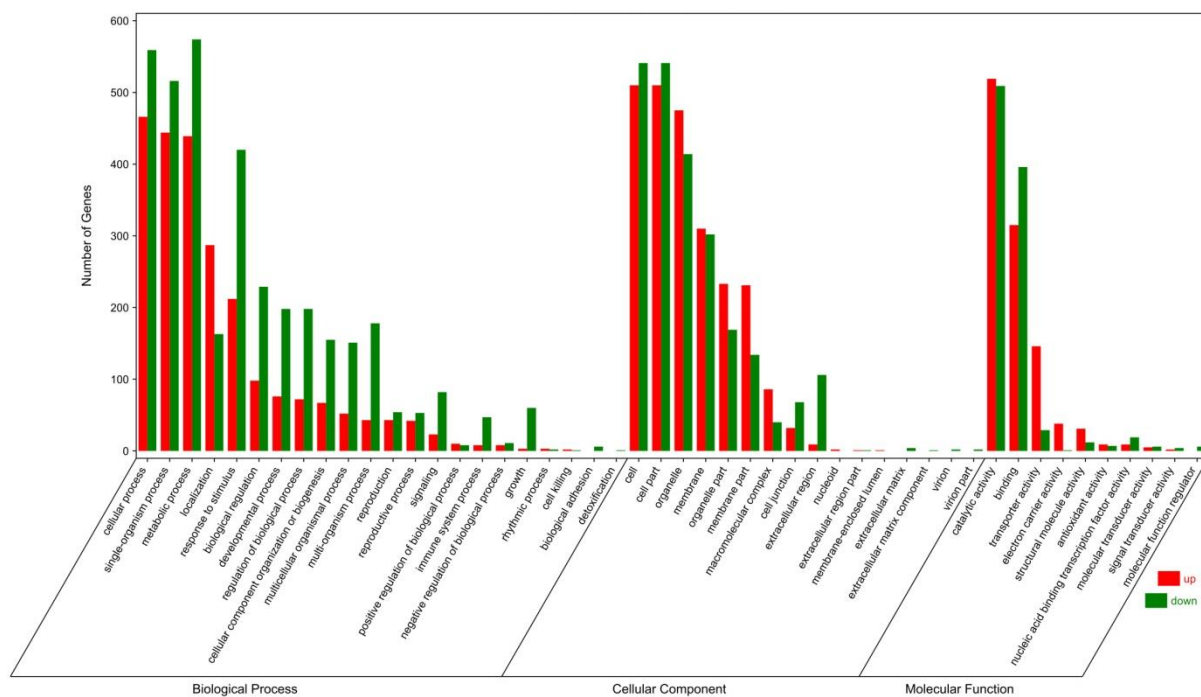

**Figure S9:** GO classification of the DEGs in M1 vs M2.

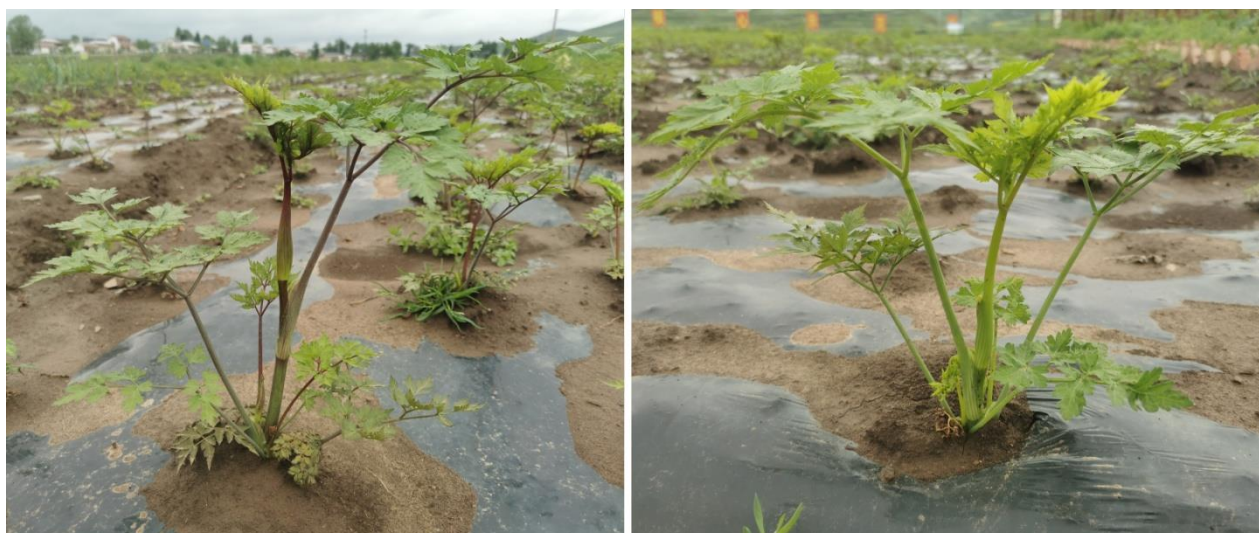

**Mingui 1 (M1) with purple stem**

**Mingui 2 (M2) with green stem**

**Figure S10:** Aerial-parts characteristics of the two *Angelica sinensis* cultivars: M1 with purple stem and M2 with green stem

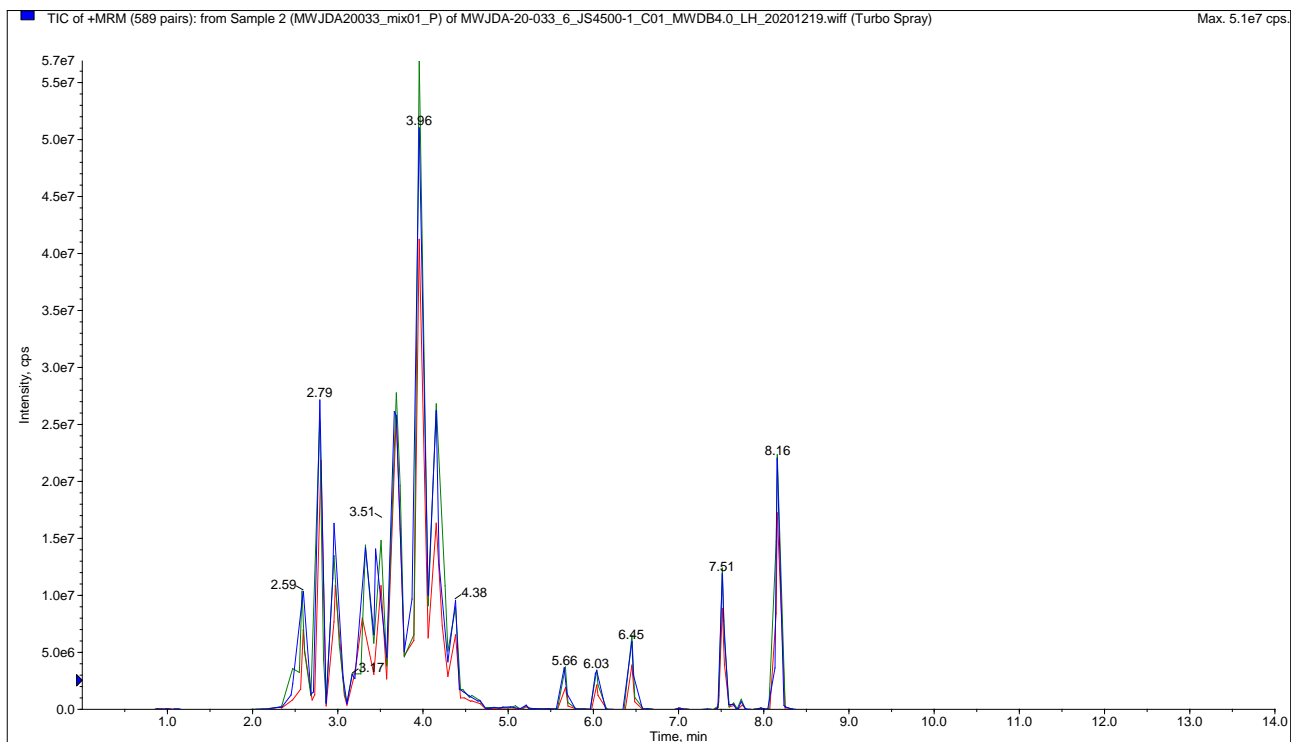

**Figure S11:** Representative total-ion-chromatogram (TIC) of QC sample

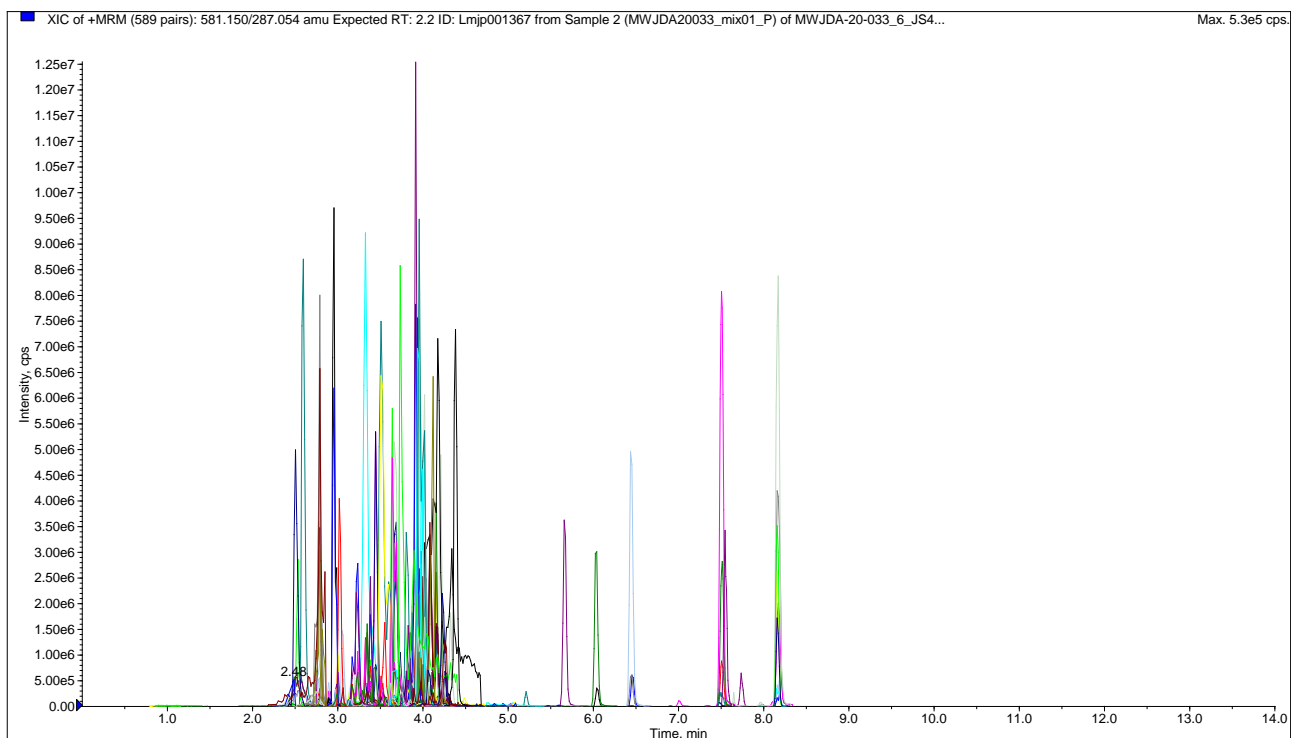

**Figure S12:** Representative TIC of MRM metabolites detection of QC sample
